# Supplementary material for: Microwave-enhanced antibacterial activity of polydopamine–silver hybrid nanoparticles
Source: Royal Society of Chemistry journal article supplement (doi:10.1039/d3ra07543e), 2024-01-01
Supplement: d3ra07543e1.pdf [file d3ra07543e1.pdf]

## Supplementary Information

### **Microwave-enhanced antibacterial activity of polydopamine-silver hybrid nanoparticles**

Swetha Lingamgunta<sup>\*a</sup>, Yao Xiao<sup>a</sup>, Heungjae Choi<sup>b</sup>, Graham Christie<sup>a</sup>, Ljiljana Fruk<sup>&a</sup>

<sup>a</sup> Department of Chemical Engineering and Biotechnology, University of Cambridge, Cambridge, UK

<sup>b</sup> School of Engineering, Cardiff University, CF24 3AA, UK

<sup>&</sup> Corresponding author

Email: [lf389@cam.ac.uk](mailto:lf389@cam.ac.uk)

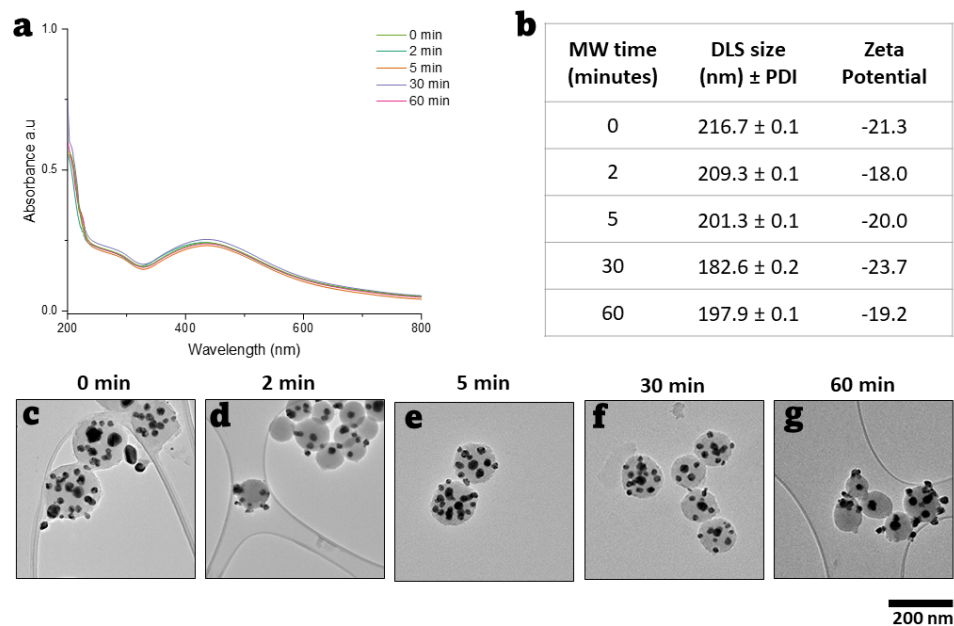

**Fig S1. Impact of microwaves on PDA-Ag NPs.** (a) UV-Vis spectra of PDA-Ag NPs after exposure to microwaves for 0 – 60 minutes. (b) Corresponding DLS size and zeta potential data of the samples are shown on the right. TEM images taken from sample at different intervals are shown in c-g.

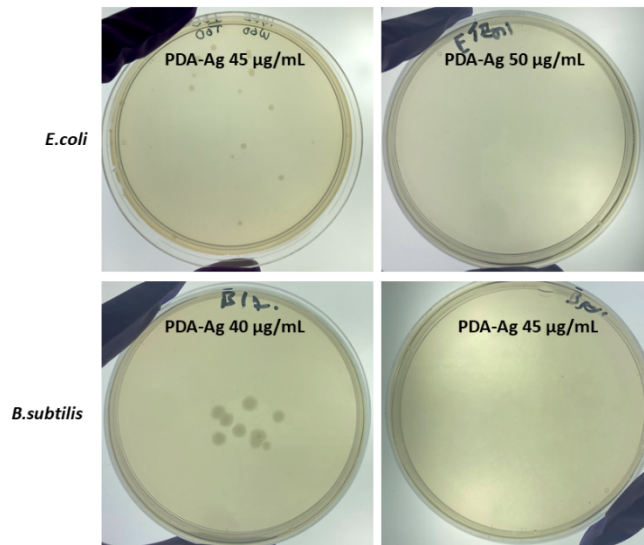

**Fig S2. Minimum bactericidal concentration images.** Pictures of agar plates (1 of 3 biological repeats) used to determine the MBC of PDA-Ag NPs for *E.coli* and *B.subtilis*.

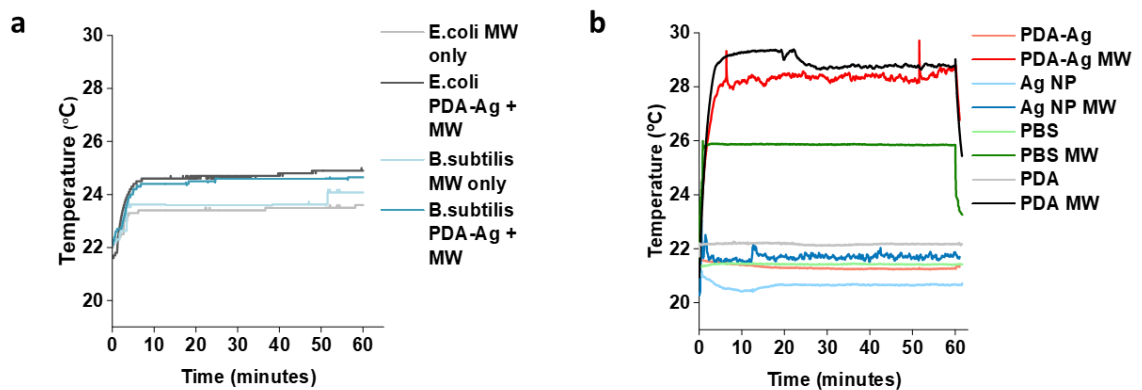

**Fig S3 Temperature measurements of test solutions during experiments.** (a) Temperature measurements during experiments (0.1 mg/mL PDA-Ag +  $10^8$  bacteria) to ensure temperature remains below thermal inactivation point. (b) Temperature measurements with 0.2 mg/mL PDA-Ag/PDA and PBS samples.

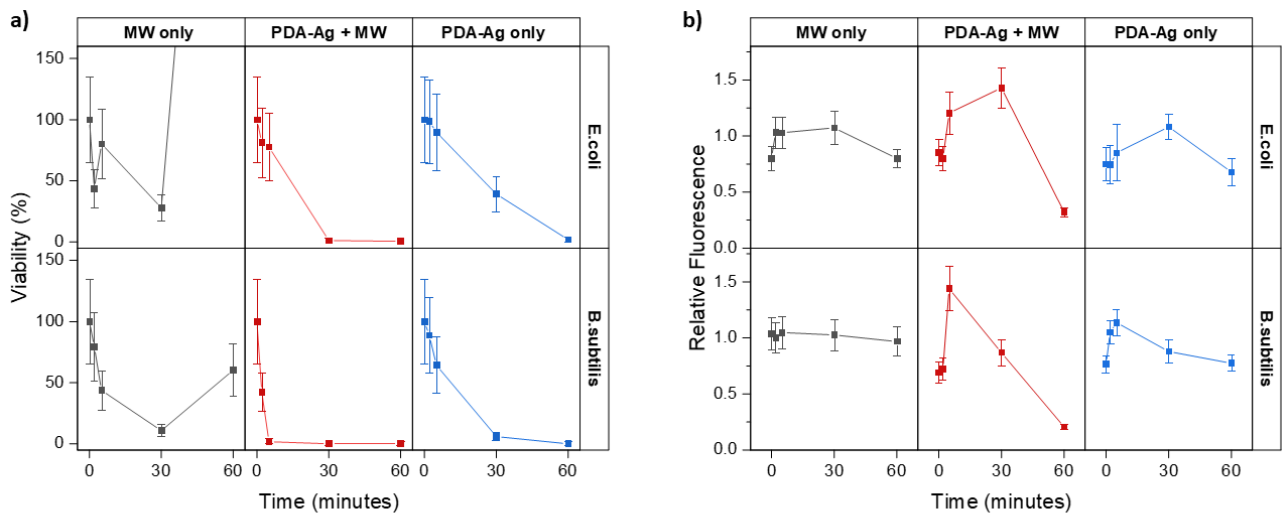

**Fig S4. Bacterial cell viability and relative fluorescence of ROS indicators (showing bacterial ROS production).** **(a)** Viability of *E.coli* and *B.subtilis* under microwave (MW) exposure, in presence of PDA-Ag NPs and MWs, and PDA-Ag NPs only. **(b)** Relative fluorescence of DCF (intracellular ROS indicator) for *E.coli* and *B.subtilis* in presence of microwaves (MW), PDA-Ag NPs and MW, and PDA-Ag NP only.

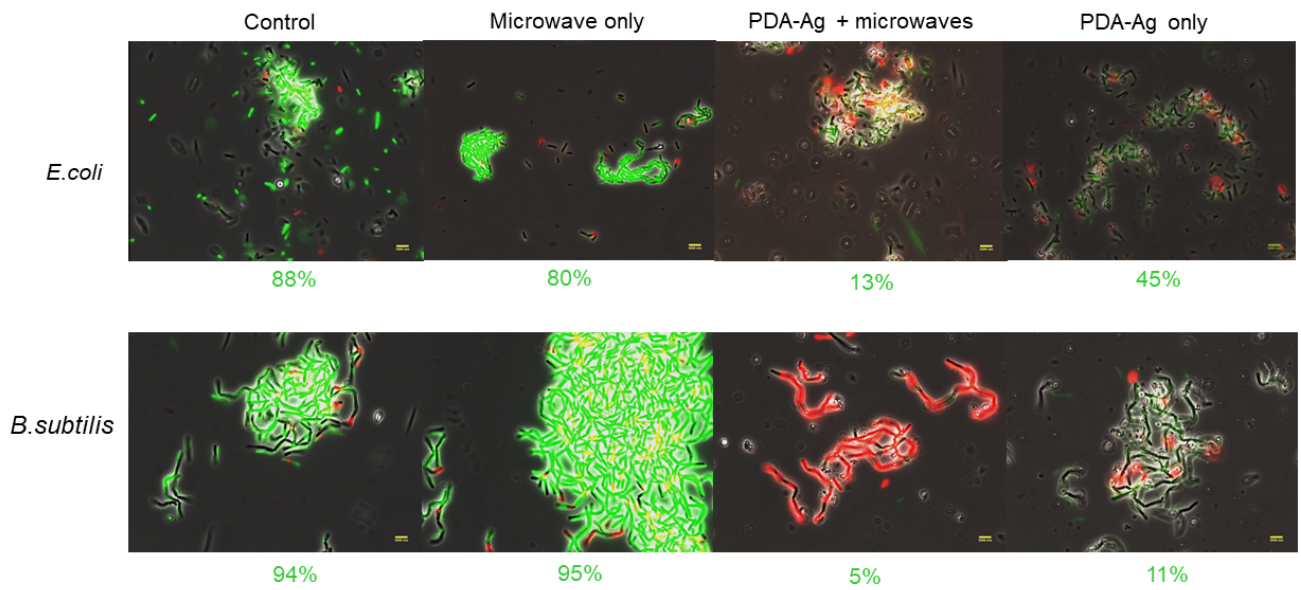

**Fig S5. Live/dead assay images using SYTO 9 dye and propidium iodide staining.** Fluorescent images showing *E.coli* and *B.subtilis*; control, microwave (MW) exposure, PDA-Ag and MW exposure or PDA-Ag only. SYTO 9 dye shows live cells in green, propidium iodide shows dead cells in red.

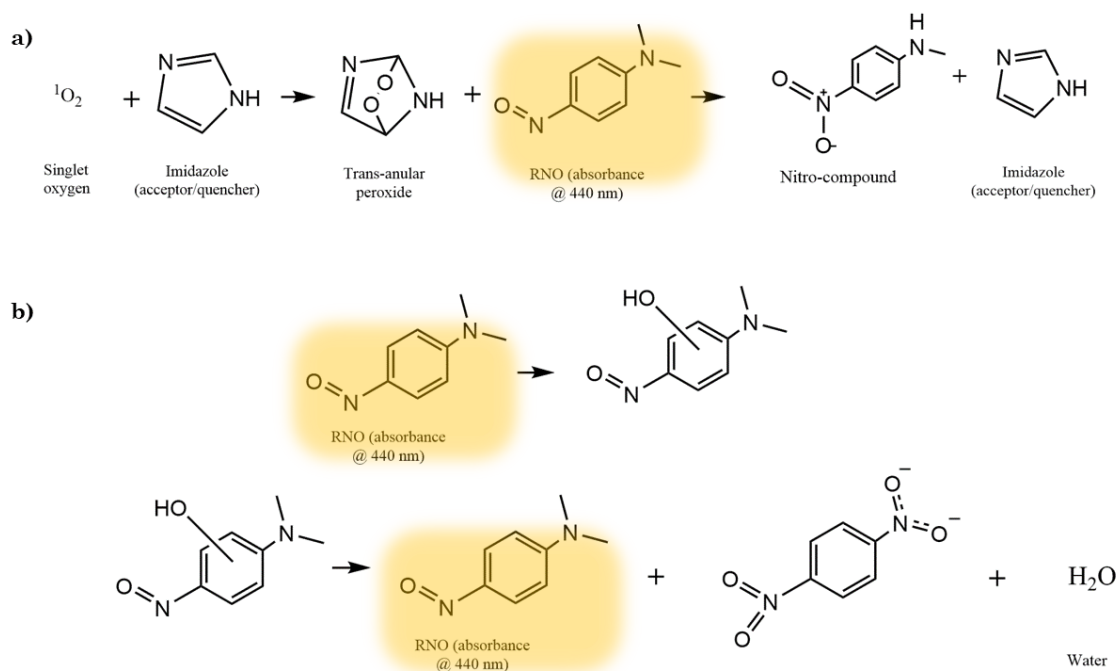

**Fig S6. RNO assay used for the detection of singlet oxygen and hydroxyl.** Mechanisms of (a) singlet oxygen and (b) hydroxyl detection using RNO.

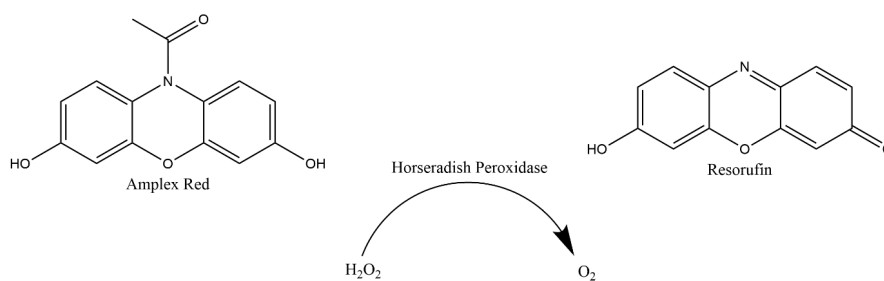

**Fig S7. Amplex Red assay used for the detection of hydrogen peroxide and superoxide.** Mechanism of hydrogen peroxide (H<sub>2</sub>O<sub>2</sub>) and superoxide sensing through the colorimetric detection of resorufin at 587 nm (with and without superoxide dismutase).
